# Supplementary material
Source: publisher site journal article supplement (https://www.dovepress.com/get_supplementary_file.php?f=246966.docx)
Supplement: Supplementary file 1 [file get_supplementary_file.php]

**Supporting Information**


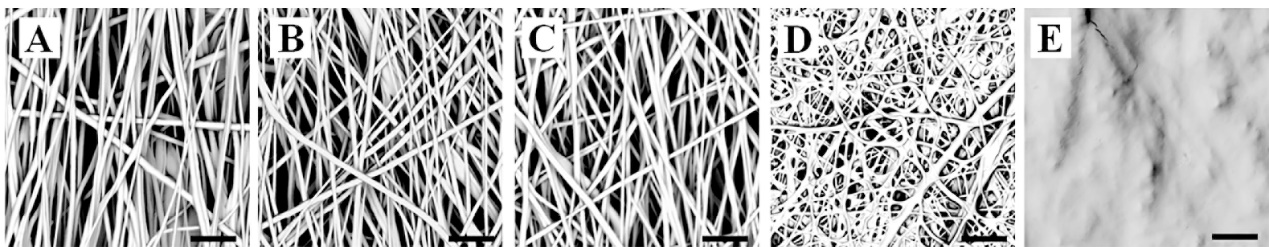


**Figure S1.** The SEM images of crosslinked scaffoldsafter immersion in PBS. (A) Pure PCL, (B) PCL/PTMC-MA (3:1), (C) PCL/PTMC-MA (1:1), (D) PCL/PTMC-MA (1:3) and (E) PTMC-MA.Scale bar: 10 **m.

**Table S1. Average molecular weight and polydispersity index (PDI) of PTMC characterized by GPC.**

|  | **Mn (kg/mol)** | **Mw (kg/mol)** | **PDI** |
| --- | --- | --- | --- |
| **PTMC** | 21.90 | 34.30 | 1.56 |

**Table S2.** **The optimum exposure time of pure PTMC-MA**

| **Exposure time/min** | **5** | **10** | **15** |
| --- | --- | --- | --- |
| **Dry mass-initial/g** | 0.0268 | 0.0159 | 0.0318 |
| **Dry mass-final/g** | 0.0241 | 0.0158 | 0.0288 |
| **Sol content** | 89.93% | 99.37% | 90.57% |
